# Supplementary material
Source: PubMed Central journal article supplement (PMC11088744)
Supplement: NIHMS1926730-supplement-2.pdf [file NIHMS1926730-supplement-2.pdf]

**Figure S1**

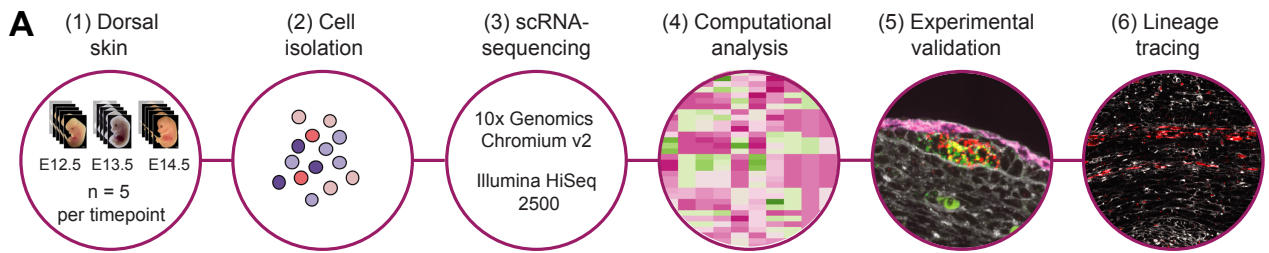

All 15 skin samples were processed individually

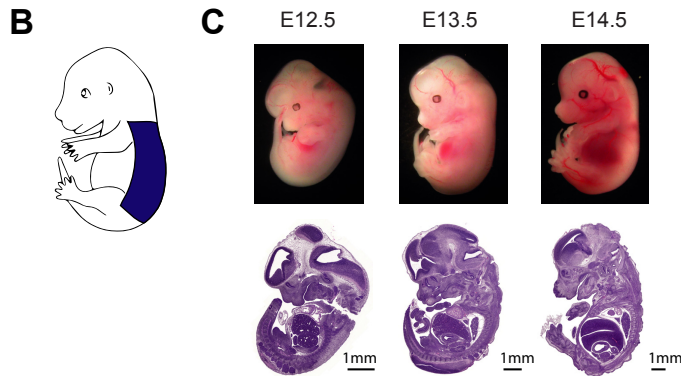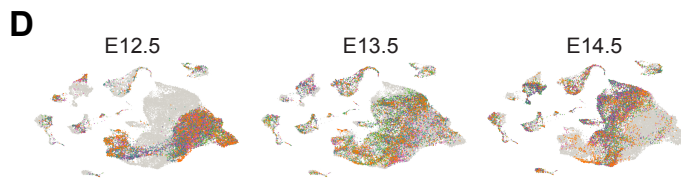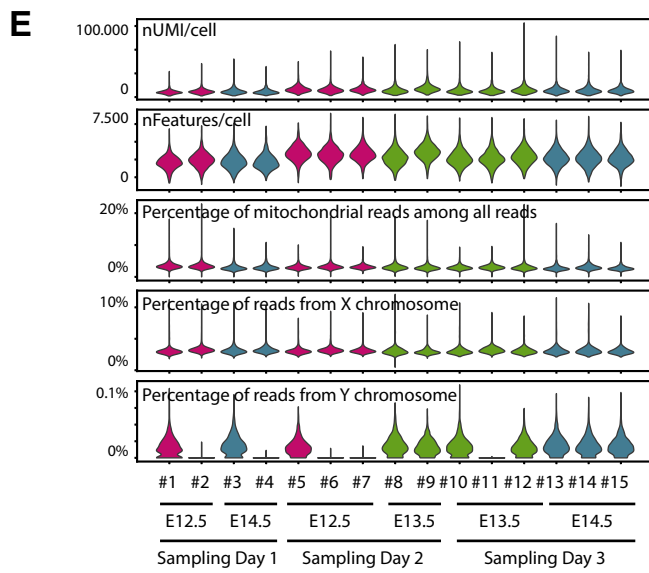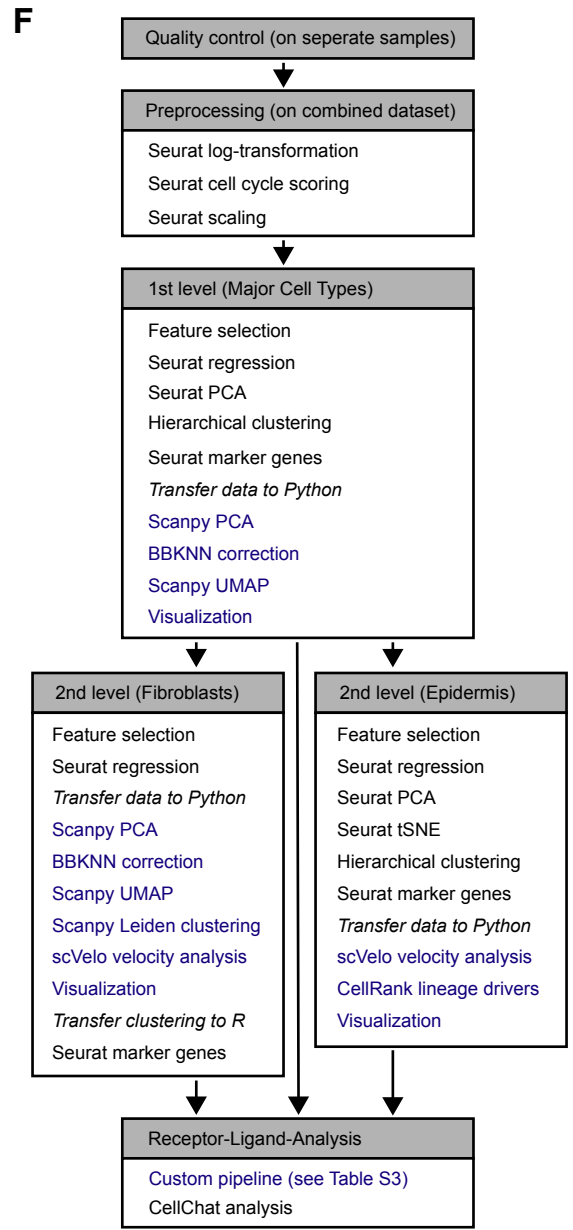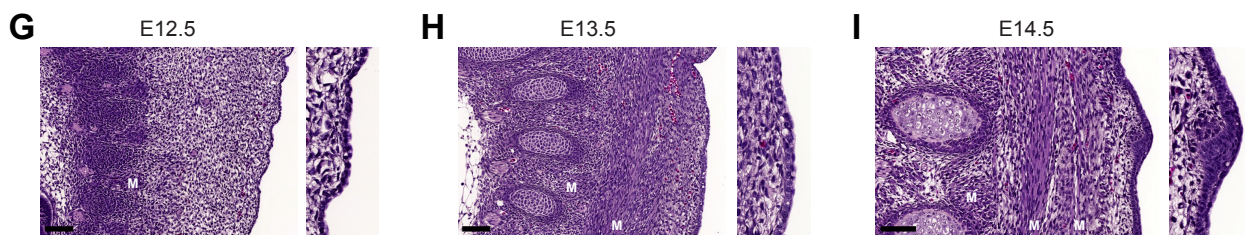

**Figure S1. Details of experimental approach and quality control, Related to Figure 1**

(A) Overview of the experimental workflow.

(B) Sampling area highlighted in blue.

(C) Representative photos and H&E sagittal sections of embryos at the analysed embryonic time points.

(D) Sample contributions (n = 5 biological replicates) per timepoint overlaid on combined UMAP.

(E) Violin plots showing a uniform distribution of QC measures (reads/cell, genes/cell and percentage of mitochondrial reads among all reads) among all 15 biological replicates (upper 3 panels). Violin plots showcasing the approach of retrospective sex determination (lower 2 panels). Only male embryos show reads from Y chromosome.

(F) Flow diagram summarizing the analysis workflow. Black font marks steps that were performed in R and blue font marks steps that were performed in Python.

(G-I) H&E stained tissue sections of dorsal skin. Zoom in on epidermis (including a developing hair follicle in (I)). M marks developing muscle layers (for orientation in the tissue). Scale bars, 100µm.

Figure S2

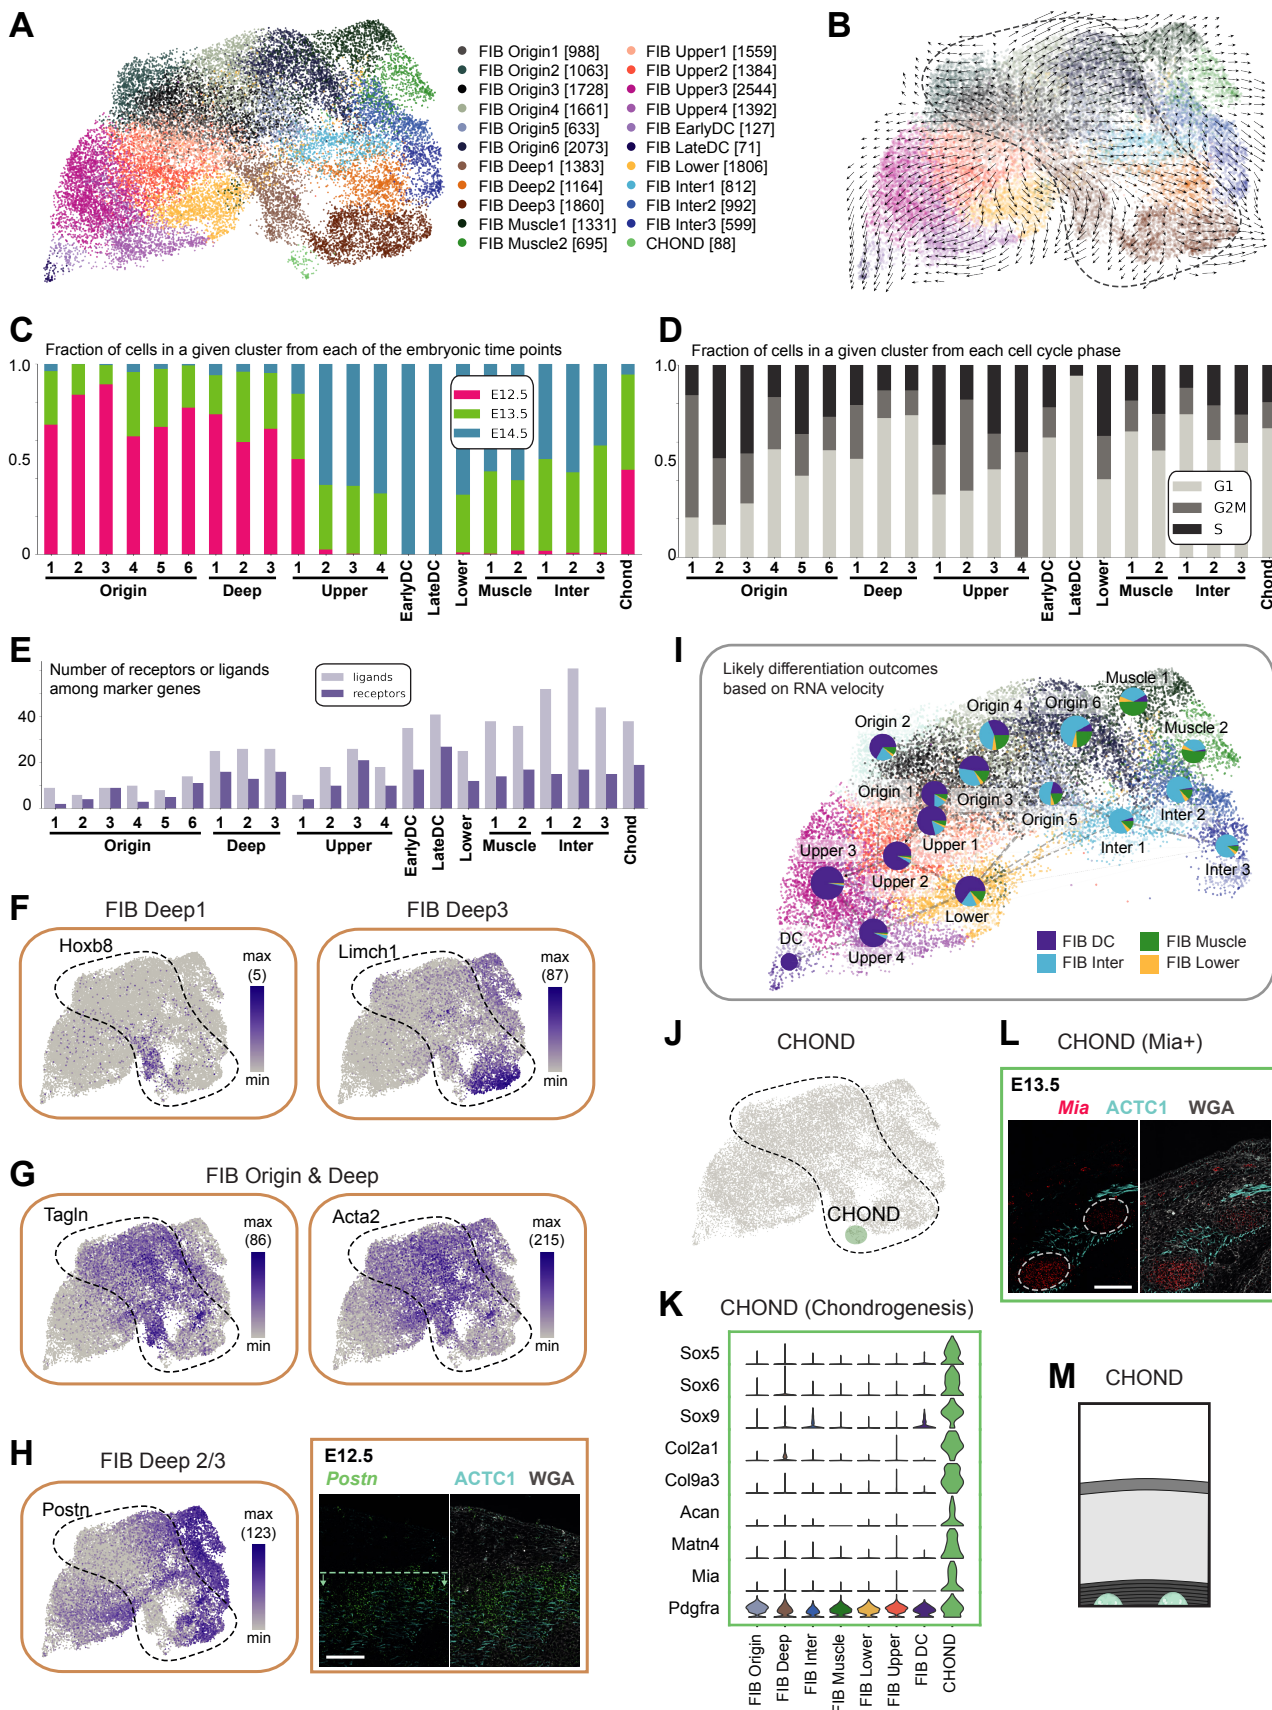

**Figure S2. Deconstruction of fibroblast heterogeneity at E12.5 (expression and location), Related to Figure 2**

- (A) UMAP with subclustering of all fibroblasts. Cell numbers per subcluster are displayed in square brackets.
- (B) UMAP, colored according to fibroblast subclustering and overlaid with RNA velocity vectors that predict developmental trajectories.
- (C-D) Bar plot visualizing the contribution of each embryonic time point (C) or each (predicted) cell cycle phase (D) to each fibroblast subcluster.
- (E) Bar plot showing the number of ligands and receptors among the marker genes of each fibroblast subcluster.
- (F-G) UMAP with expression pattern of additional *FIB Deep* marker genes (F) and additional marker genes shared between *FIB Origin* and *FIB Deep* (G). Number in brackets shows max number of RNA copies detected per cell (absolute abundance).
- (H) UMAP with expression pattern of *Postn* (left panel). *Postn* mRNA staining plus ACTC1 protein staining (right panel). Dashed lines and arrows highlight the region with highest expression. Counterstained with WGA (membraneous stain). Microscope images originate from larger tile scan (n = 3 mice). Scale bars, 100µm.
- (I) Directed PAGA plot showing the most likely differentiation outcomes of each fibroblast subpopulation based on RNA velocity. Cells are colored according to fibroblast subclustering and pie chart segments are colored according to the differentiation outcomes.
- (J) *FIB CHOND* cells highlighted on the UMAP.
- (K) Violin plots of *FIB CHOND* marker gene expression.
- (L) *Mia* mRNA and *ACTC1* protein staining reveals location of *FIB CHOND* cells. Microscope image originates from larger tile scan (n = 3 mice). Scale bar, 100µm.
- (M) Scheme summarizing the location of *FIB CHOND* cells within the tissue at E12.5.



**Figure S3**

**A** FIB Upper & DC

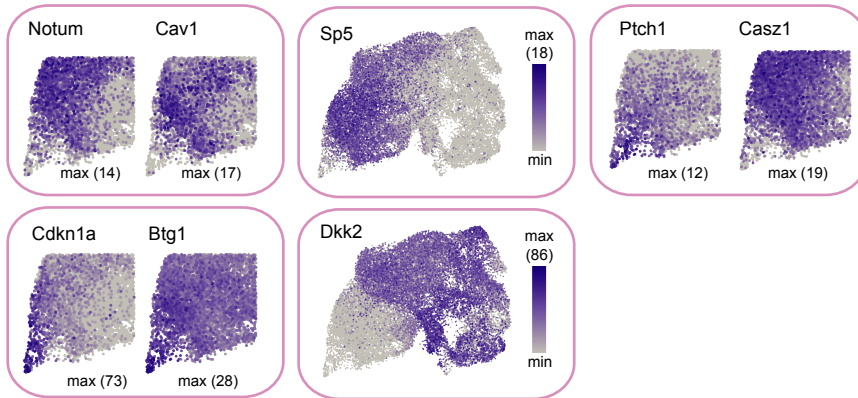

**B**

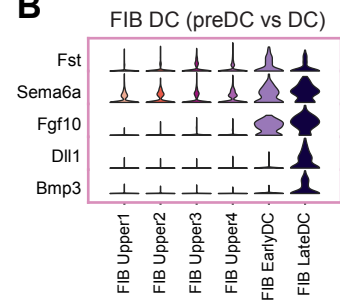

**C** FIB Muscle

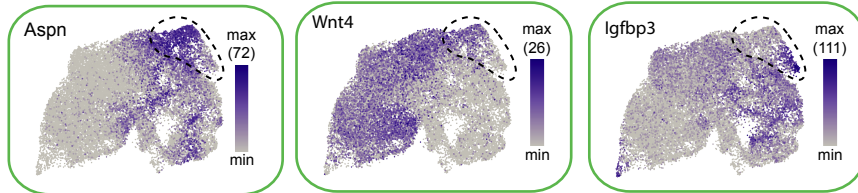

**D**

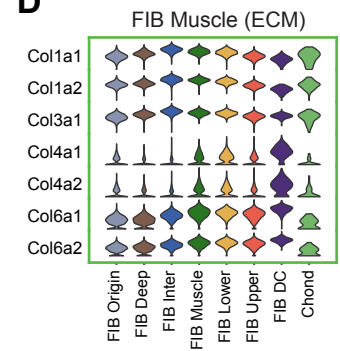

**E** FIB Inter

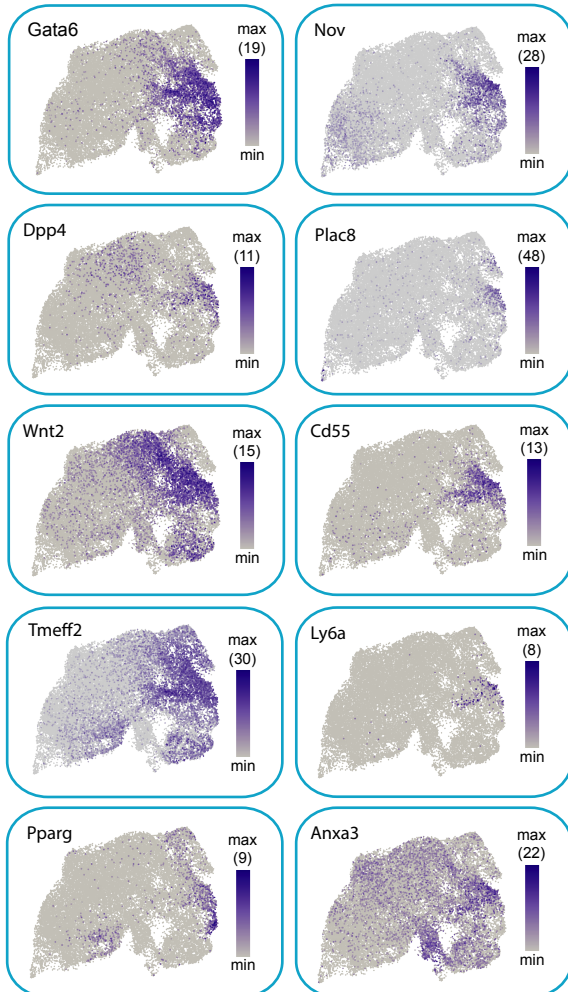

**F**

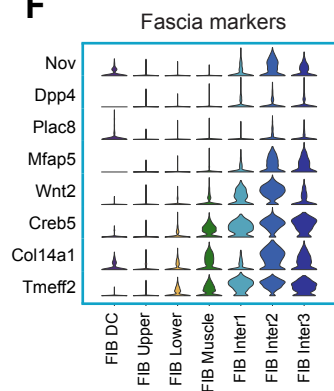

**G**

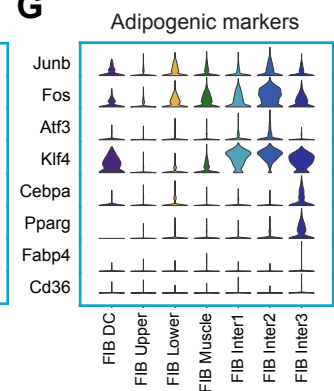

**H**

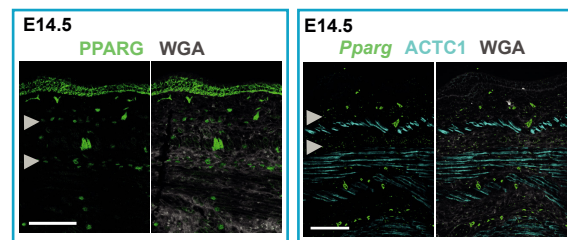

**I**

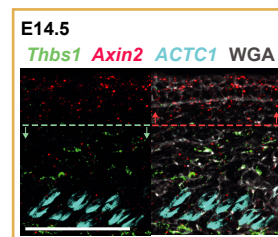

**Figure S3. Deconstruction of fibroblast heterogeneity at E13.5 and E14.5 (expression and location), Related to Figure 3**

(A,C,E) UMAP with expression pattern of additional *FIB Upper / DC* marker genes (A), *FIB Muscle* marker genes (C), and *FIB Inter* marker genes (E).

(B,D,F,G) Violin plots of DC marker gene expression (B), ECM-related gene expression (D), fascia-related marker gene expression (F), and adipogenesis-related marker gene expression (G).

(H) PPARG protein staining (left panel) and *Pparg* mRNA staining plus ACTC1 protein staining (right panel). Arrowheads mark layers with maximal staining.

(I) *Thbs1* and *Axin2* mRNA staining plus ACTC1 protein staining. Dashed lines with arrows highlight the region with highest expression.

(H-I) Microscope images originate from larger tile scan (n = 3 mice). Scale bars, 100µm.

Figure S4

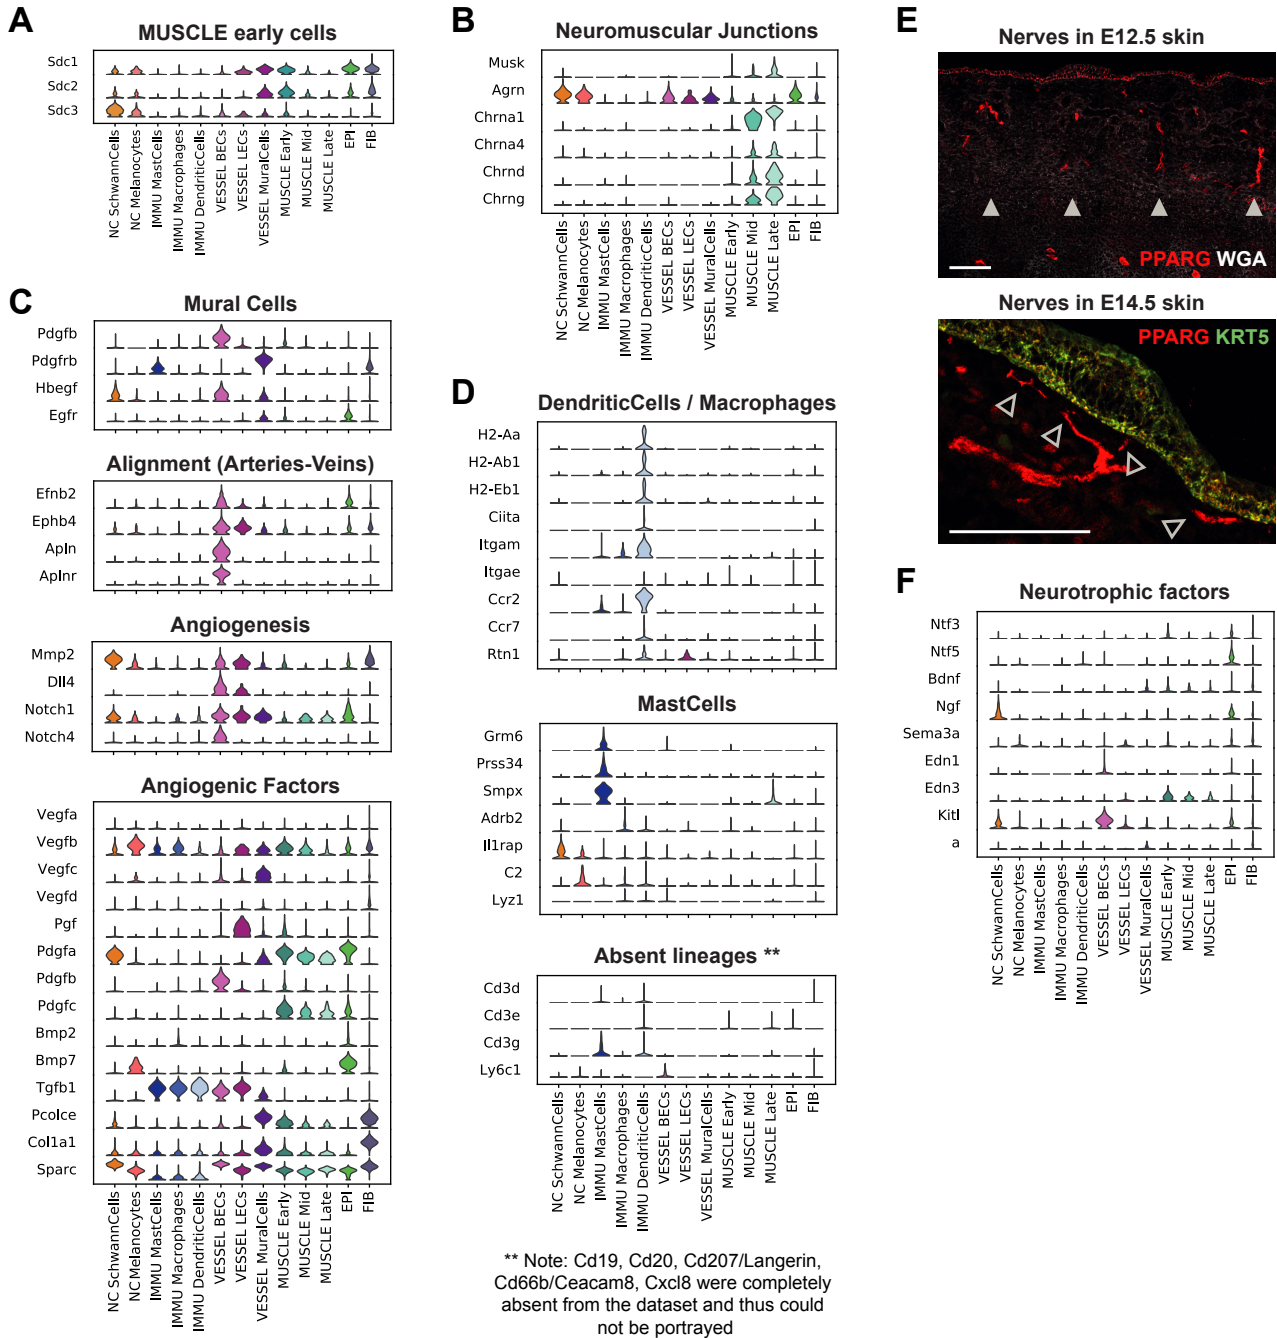

**Figure S4. Cell types contributing to embryonic skin besides fibroblasts and keratinocytes, Related to Figure 5 and 6**

(A-D,F) Violin Plots showing expression of markers used to further characterize the captured muscle cells (A,B), vessel-associated cells (C), immune cells (D), and neural crest-derived cells (F).

(E) PPARG and KRT5 protein staining at E12.5 and E14.5, respectively. Filled arrowheads mark thick nerve bundles traversing dermis at the height of each vertebrae (asterisks). Empty arrowheads mark nerve endings extending towards epidermis. Microscope images originate from larger tile scans (n = 3 mice). Scale bars, 100 $\mu$ m.

Figure S5

A

Receptor-Ligand pairs supporting  
Angiogenesis,  
vascular remodelling

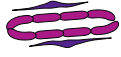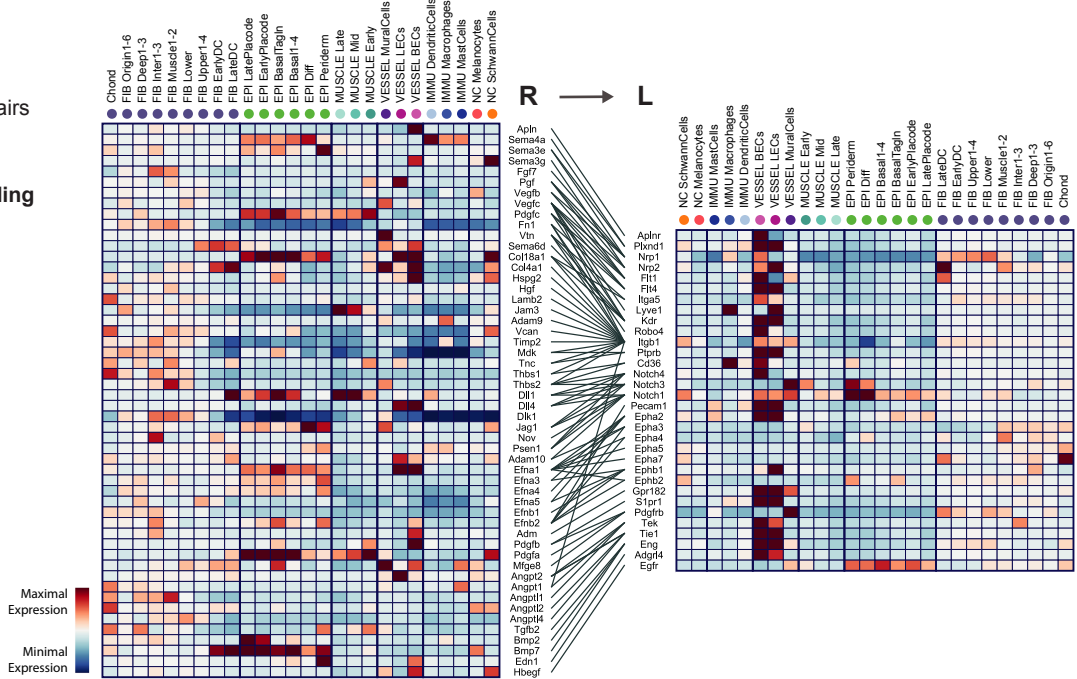

B

Receptor-Ligand pairs supporting  
Axon guidance,  
neuronal support,  
melanocyte development,  
melanocyte recruitment

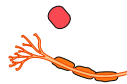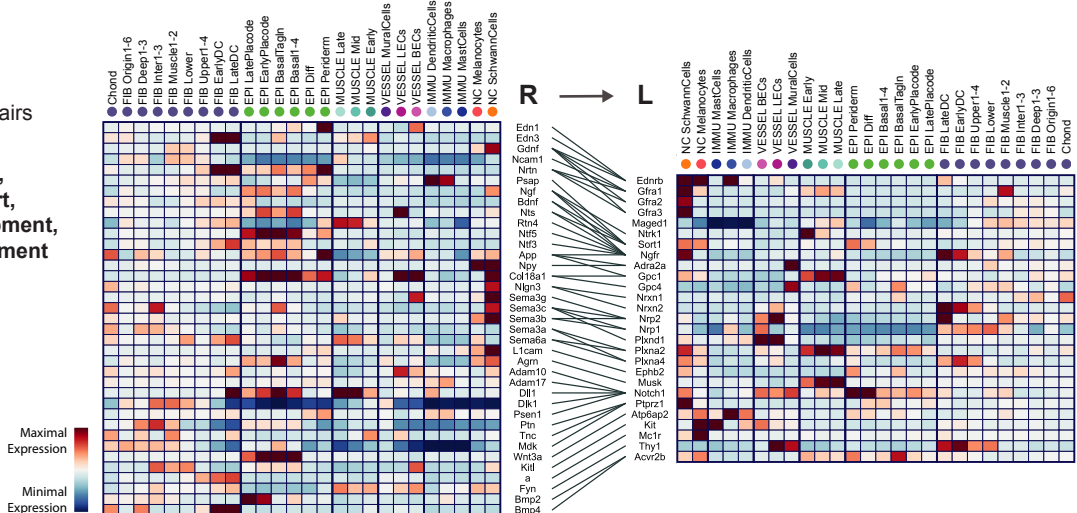

C

Receptor-Ligand pairs supporting  
Immune cell development,  
recruitment,  
activation

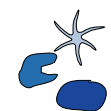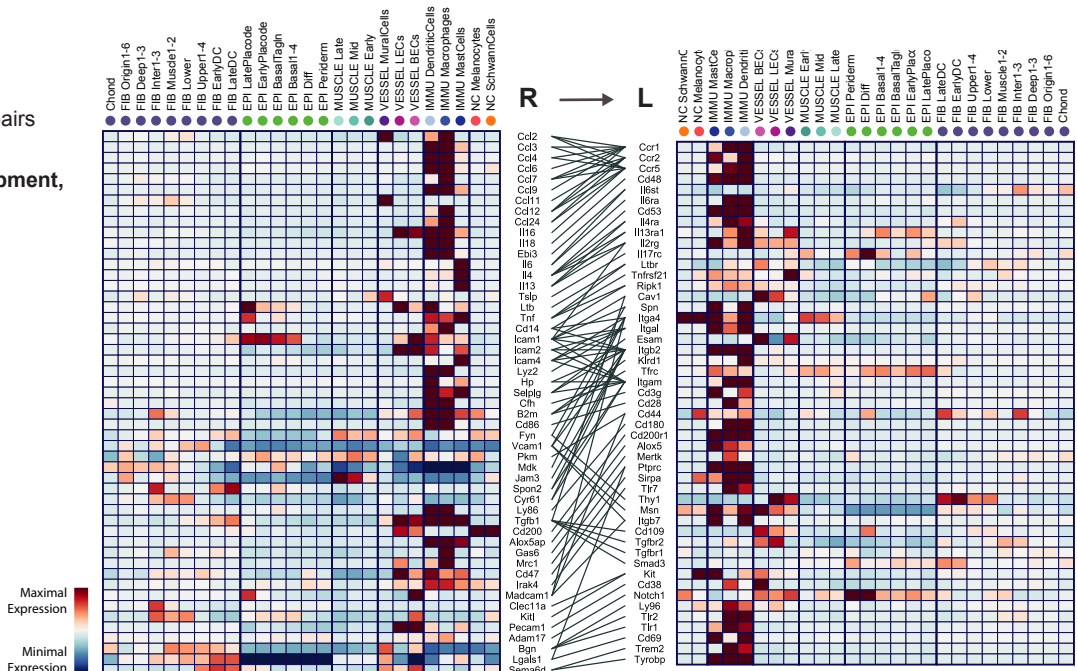

Note: *Icam1-Ilg2g*, *Vcam1-Msn*, *Cd14-Ilg2*, *Cd14-Ilgb2*, and *Cd14-Ripk1* are interacting receptors



**Figure S5. Receptor-ligand interactions supporting recruitment/maintenance of vessel-associated, immune and neural crest-derived cells, Related to Figure 6.**

(A-C) Receptor-ligand pairs with probable involvement in angiogenesis and/or vascular remodelling (A), axon guidance, neuronal support, melanocyte development, and/or melanocyte recruitment (B), or immune cell development, recruitment and/or activation (C). Heatmaps show the expression pattern of interaction partners among all first-level clusters as well as fibroblast and keratinocyte subclusters. Central lines mark significant receptor-ligand pairs observed in our dataset.

**Figure S6**

**A** Keratinocyte subtypes (tSNE)

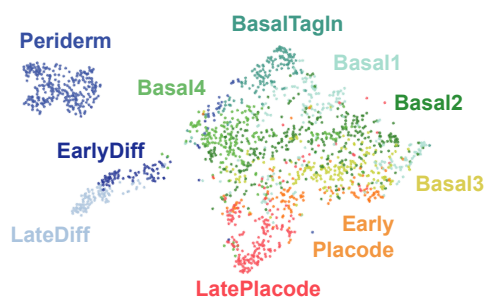

**B** Basal1 marker expression

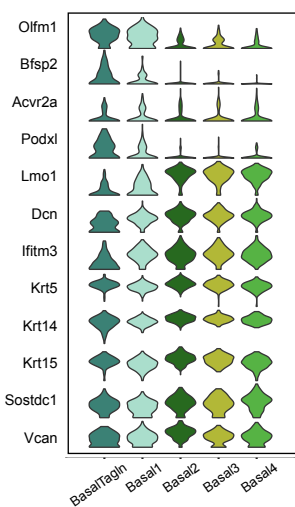

**C** Fraction of cells in a given cluster from each embryonic time point

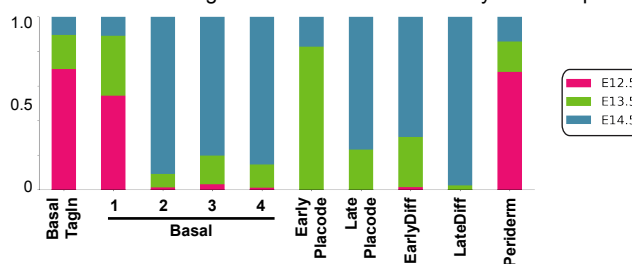

**D** Fraction of cells in a given cluster from each embryonic time point

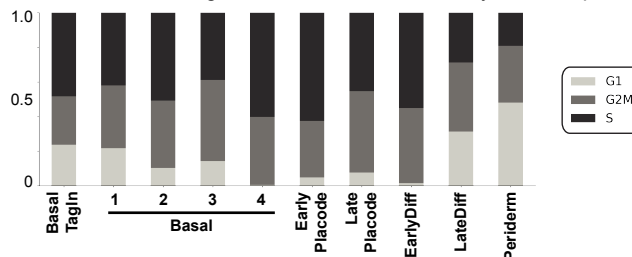

**E** Number of receptors or ligands among marker genes

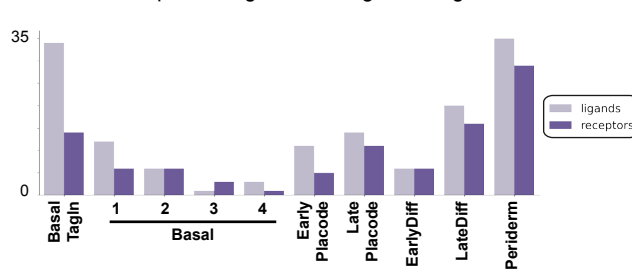

**F** Cell-type interactions in E12.5 skin

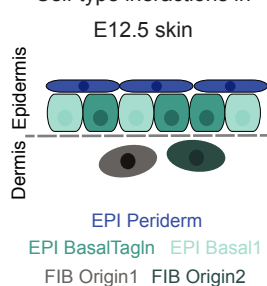

**G** Number of interactions

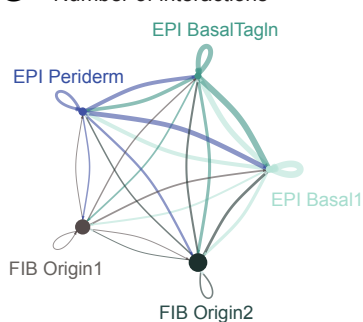

**I** Incoming communication patterns (Receiving cells)

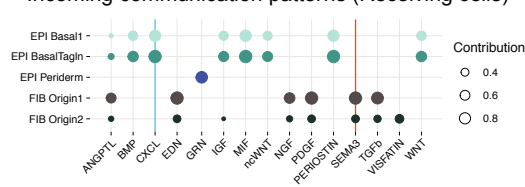

Outgoing communication patterns (Sending cells)

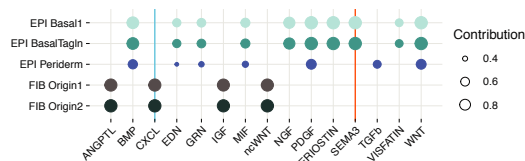

**H** Sending cells

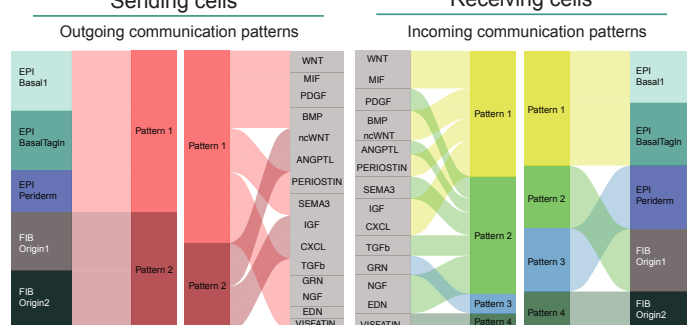

**J** FIB → EPI CXCL network and EPI → FIB SEMA3 network

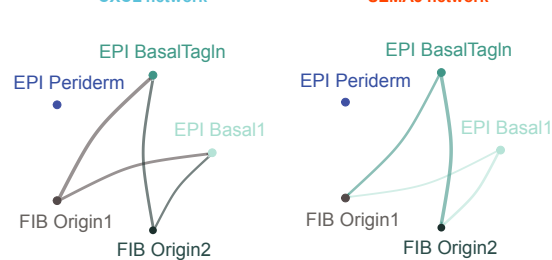

**Figure S6. Epidermal development – Cellular heterogeneity at E12.5, Related to Figure 7**

- (A) tSNE visualization of all keratinocytes, colored according to keratinocyte subclustering.
- (B) Violin plot showing overlapping signatures in *EPI Basal1* population.
- (C-D) Bar plot visualizing the contribution of each embryonic time point (C) or each (predicted) cell cycle phase (D) to each keratinocyte subcluster.
- (E) Bar plot showing the number of ligands and receptors among the marker genes of each keratinocyte subcluster.
- (F) Scheme of E12.5 keratinocyte and fibroblast subclusters included in the interaction analysis; only FIB Origin clusters located in close proximity to epidermis were included.
- (G-J) CellChat generated cell communication analysis.
- (G) Circle plot visualizing number of interactions between E12.5 keratinocyte and fibroblast subclusters. Edge width proportional to the number of interactions. Edges colored according to sending cell population.
- (H) Sankey plot with inferred outgoing and incoming latent communication patterns. The thickness of the flow indicates the contribution of the cell group or signaling pathway, respectively, to each latent pattern.
- (I) Dot plot showing outgoing and incoming signaling patterns between E12.5 keratinocyte and fibroblast subclusters. Dot size proportional to enrichment of signaling pathway in the cell population.
- (J) Circle plots for selected signaling pathways with significant interactions.

Figure S7

**A** Periderm Maturation Markers

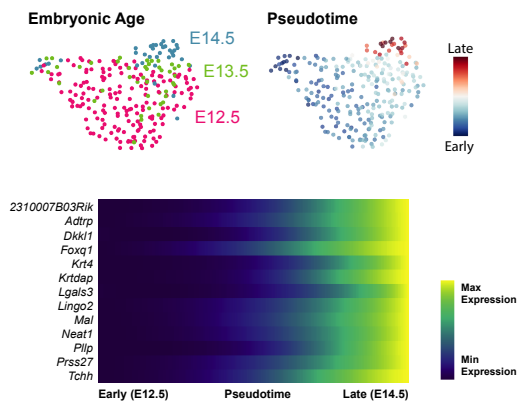

**B**

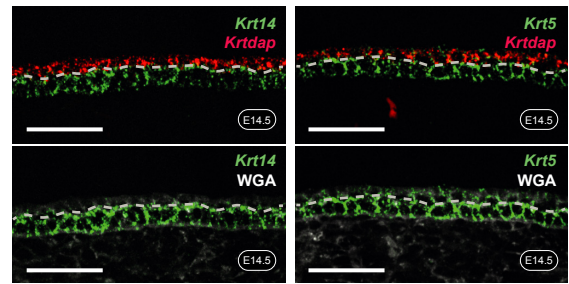

**C**

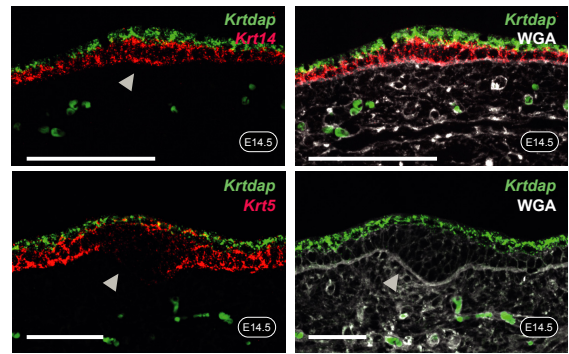

**D**

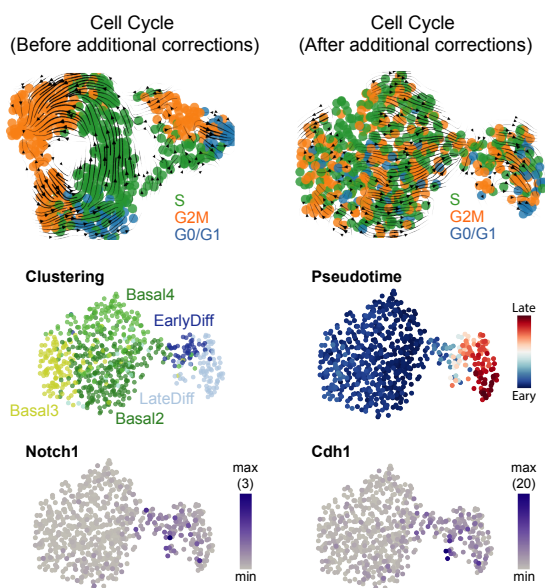

**E**

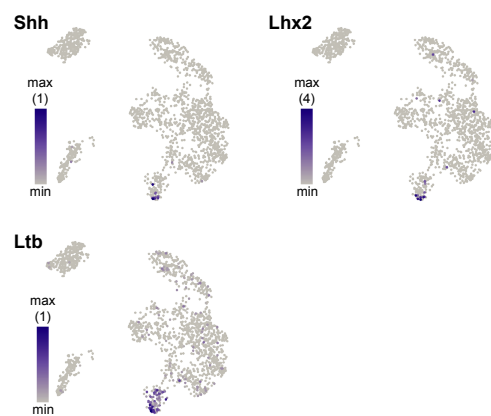

**F**

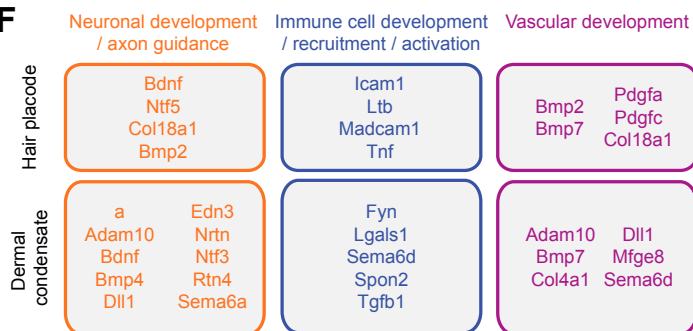

**Figure S7. Epidermal development - From a single basal layer towards a HF-inducing and stratified epithelium, Related to Figure 7**

(A) UMAP of periderm cells, colored according to embryonic age (upper left panel) or pseudotime (upper right panel), respectively. Heatmap of genes related to periderm maturation (upper panel). A pseudotime was modeled based on *EPI Periderm* cells from all embryonic time points and pseudotime-dependent genes were determined. Genes peaking latest in pseudotime were chosen for display on heatmap.

(B) *Krt14* and *Krt5* mRNA staining (left panels) and *Krt5* and *Krt14* mRNA staining (right panels); revealing differing expression pattern of *Krt5* and *Krt14* in suprabasal layer. Dashed line marks basal-suprabasal border.

(C) *Krt14*, *Krt5* and *Krt5* mRNA staining; confirming downregulation of *Krt5* and maintenance of *Krt14* in the developing hair placode (arrowhead) and showing a continuous layer of suprabasal *Krt5*<sup>+</sup> cells covering the hair placode.

(B-C) Microscope image originates from larger tile scan (n = 3 mice). Scale bars, 50µm.

(D) UMAP of keratinocyte subset (*EPI Basal1-4*, *EPI EarlyDiff*, and *EPI LateDiff* cells from E14.5) used to delineate epidermal stratification. Row one: UMAP before and after additional corrections for cell cycle (see [Methods](#)), colored according to (predicted) cell cycle phase and overlaid with velocity vectors predicting developmental trajectories. Row two: UMAP (from upper right panel), colored according to keratinocyte subclustering (left panel) or pseudotime (right panel), respectively. Row three: UMAP (from upper right panel) with expression of *Notch1* and *Cdh1*.

(E) UMAP with expression pattern of placode markers.

(F) Summary scheme with selected hair placode- and dermal condensate-derived factors promoting neuronal, immune cell, and vascular development.



**Table S4. Oligonucleotides, Related to STAR Methods and Key Resources Table.**

| REAGNET or RESOURCE                  | SOURCE            | IDENTIFIER     |
|--------------------------------------|-------------------|----------------|
| <b>Oligonucleotides</b>              |                   |                |
| <i>3-plex Positive Control Probe</i> | ACDBio/Bio-Techne | Cat# 320881    |
| <i>3-plex Negative Control Probe</i> | ACDBio/Bio-Techne | Cat# 320871    |
| <i>Mm-Axin2</i>                      | ACDBio/Bio-Techne | Cat# 400331-C3 |
| <i>Mm-Creb5</i>                      | ACDBio/Bio-Techne | Cat# 572891-C1 |
| <i>Mm-Dkk1</i>                       | ACDBio/Bio-Techne | Cat# 402521-C3 |
| <i>Mm-Dkk4</i>                       | ACDBio/Bio-Techne | Cat# 404851    |
| <i>Mm-Ebf2</i>                       | ACDBio/Bio-Techne | Cat# 550841-C3 |
| <i>Mm-Gal</i>                        | ACDBio/Bio-Techne | Cat# 400961-C3 |
| <i>Mm-Hapln1</i>                     | ACDBio/Bio-Techne | Cat# 448201-C2 |
| <i>Mm-Krt5</i>                       | ACDBio/Bio-Techne | Cat# 415041-C2 |
| <i>Mm-Krt8</i>                       | ACDBio/Bio-Techne | Cat# 424521-C3 |
| <i>Mm-Krt10</i>                      | ACDBio/Bio-Techne | Cat# 457901    |
| <i>Mm-Krt14</i>                      | ACDBio/Bio-Techne | Cat# 422521-C3 |
| <i>Mm-Krtdap</i>                     | ACDBio/Bio-Techne | Cat# 500671    |
| <i>Mm-Lef1</i>                       | ACDBio/Bio-Techne | Cat# 441861    |
| <i>Mm-Ltb</i>                        | ACDBio/Bio-Techne | Cat# 315681-C3 |
| <i>Mm-Mfap5</i>                      | ACDBio/Bio-Techne | Cat# 490211-C2 |
| <i>Mm-Mia</i>                        | ACDBio/Bio-Techne | Cat# 498011    |
| <i>Mm-Notum</i>                      | ACDBio/Bio-Techne | Cat# 428981    |
| <i>Mm-Nppc</i>                       | ACDBio/Bio-Techne | Cat# 493291    |
| <i>Mm-Pax7</i>                       | ACDBio/Bio-Techne | Cat# 314181-C3 |
| <i>Mm-Pdgfc</i>                      | ACDBio/Bio-Techne | Cat# 441551    |
| <i>Mm-Pecam1</i>                     | ACDBio/Bio-Techne | Cat# 316721-C2 |
| <i>Mm-Pmel</i>                       | ACDBio/Bio-Techne | Cat# 422481-C2 |
| <i>Mm-Postn</i>                      | ACDBio/Bio-Techne | Cat# 418581    |
| <i>Mm-Pparg</i>                      | ACDBio/Bio-Techne | Cat# 418821    |
| <i>Mm-Ptch1</i>                      | ACDBio/Bio-Techne | Cat# 402811    |
| <i>Mm-Rgs5</i>                       | ACDBio/Bio-Techne | Cat# 430181    |
| <i>Mm-Shh</i>                        | ACDBio/Bio-Techne | Cat# 314361-C2 |
| <i>Mm-Sox9</i>                       | ACDBio/Bio-Techne | Cat# 401051-C2 |
| <i>Mm-Sox10</i>                      | ACDBio/Bio-Techne | Cat# 435931-C3 |
| <i>Mm-Thbs1</i>                      | ACDBio/Bio-Techne | Cat# 457891    |
